# Supplementary material for: Tailoring the performance of magnetic elastomers containing Fe2O3 decorated carbon nanofiber
Source: Royal Society of Chemistry journal article supplement (doi:10.1039/c7ra08861b), 2017-01-01
Supplement: c7ra08861b1.pdf [file c7ra08861b1.pdf]

## Supplementary Information

### Tailoring performance of magnetorheological elastomers containing Fe<sub>2</sub>O<sub>3</sub> decorated carbon nanofiber

Dongju Lee<sup>†a</sup> O-Seok Kwon<sup>†b</sup> and Sung Ho Song<sup>c,\*</sup>

<sup>a</sup>Nuclear Materials Development Division, Korea Atomic Energy Research Institute, 989-111 Daedeok-daero, Yuseong-gu, Daejeon, 34057, Republic of Korea

<sup>b</sup>NEXEN Tire Corporation R&D Center, 30, Yusan-Dong, Yangsan-Si, Kyungnam, Korea 626-230

<sup>c</sup>Division of Advanced Materials Engineering, Kongju National University, Chungnam 330-717, Republic of Korea

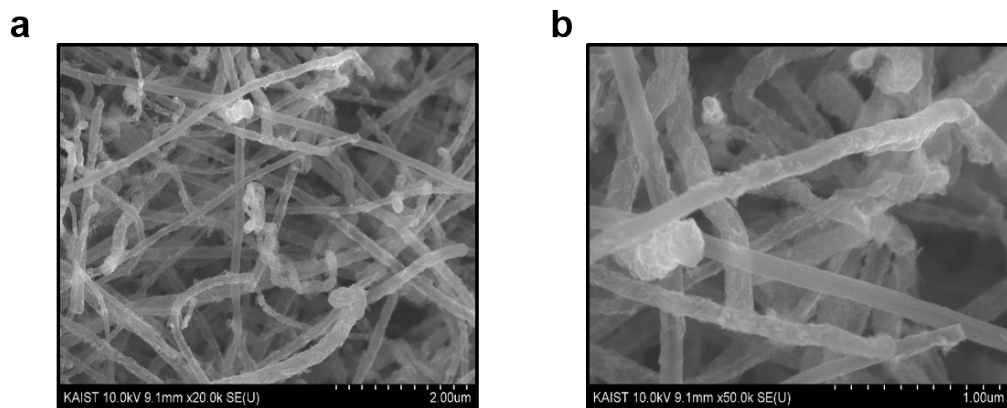

**Fig. S1.** SEM images of CNF-Fe<sub>2</sub>O<sub>3</sub>

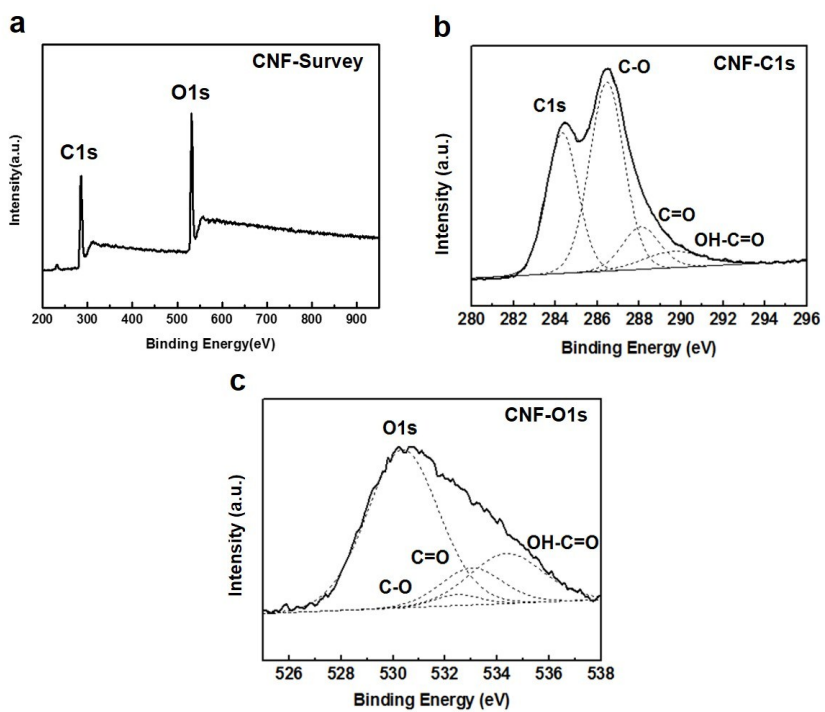

**Fig. S2.** High resolution XPS spectra of the acid treated CNF

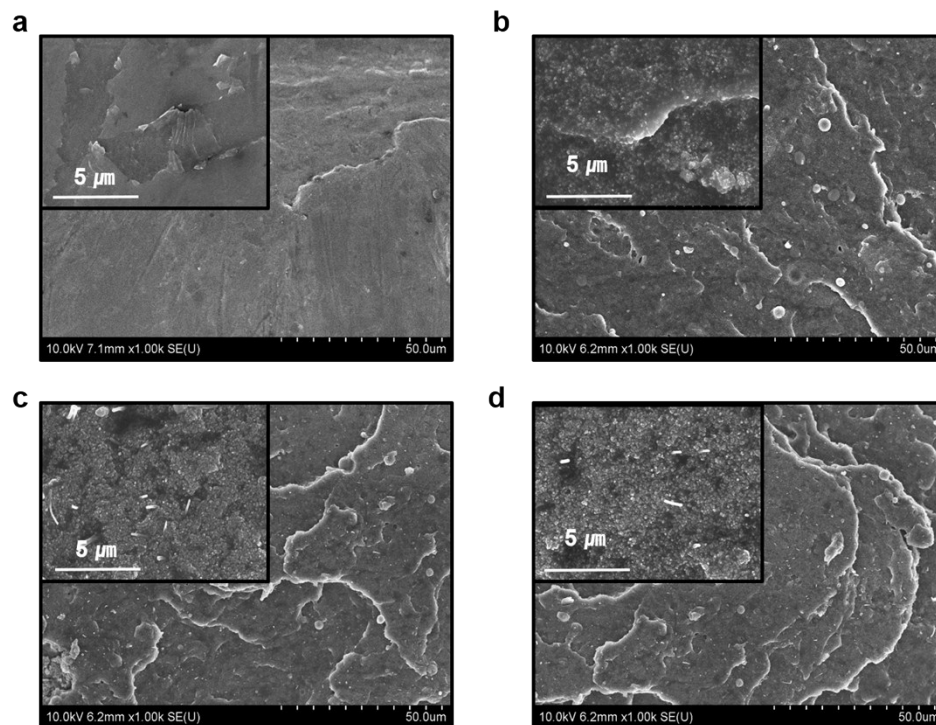

**Fig. S3.** SEM images of the fracture surfaces of the SBR composites.

**Table S1.** Formation of elastomer nanocomposites

| STEP   | Materials                          | Control | Fe <sub>2</sub> O <sub>3</sub><br>5 phr | CNF<br>5 phr | CNF-Fe <sub>2</sub> O <sub>3</sub><br>5 phr |
|--------|------------------------------------|---------|-----------------------------------------|--------------|---------------------------------------------|
| STEP 1 | SBR Latex                          | 20      | 20                                      | 20           | 20                                          |
|        | Fe <sub>2</sub> O <sub>3</sub>     | -       | 5                                       | -            | -                                           |
|        | CNF                                | -       | -                                       | 5            | -                                           |
|        | CNF-Fe <sub>2</sub> O <sub>3</sub> | -       | -                                       | -            | 5                                           |
| STEP 2 | SBR                                | 80      | 80                                      | 80           | 80                                          |
|        | Carbon Black                       | 50      | 50                                      | 50           | 50                                          |
|        | Stearic Acid                       | 1       | 1                                       | 1            | 1                                           |
|        | Sulfur                             | 1.75    | 1.75                                    | 1.75         | 1.75                                        |
|        | TBBS                               | 1       | 1                                       | 1            | 1                                           |
